# Supplementary material for: Tesmin, Metallothionein-Like 5, is Required for Spermatogenesis in Mice
Source: PubMed Central journal article supplement (PMC7124961; doi:10.1093/biolre/ioaa002), 2020-01-09
Supplement: s_i_ioaa002.pdf [file s_i_ioaa002.pdf]

Fig. S1 (Oji *et al.*)

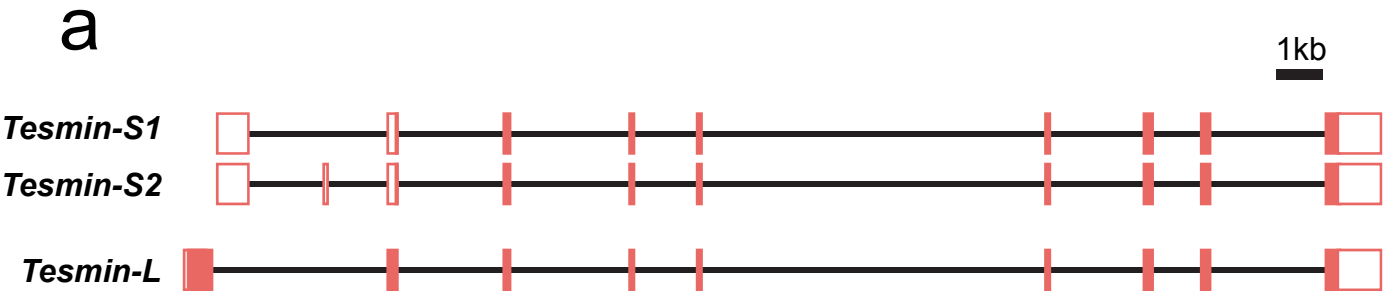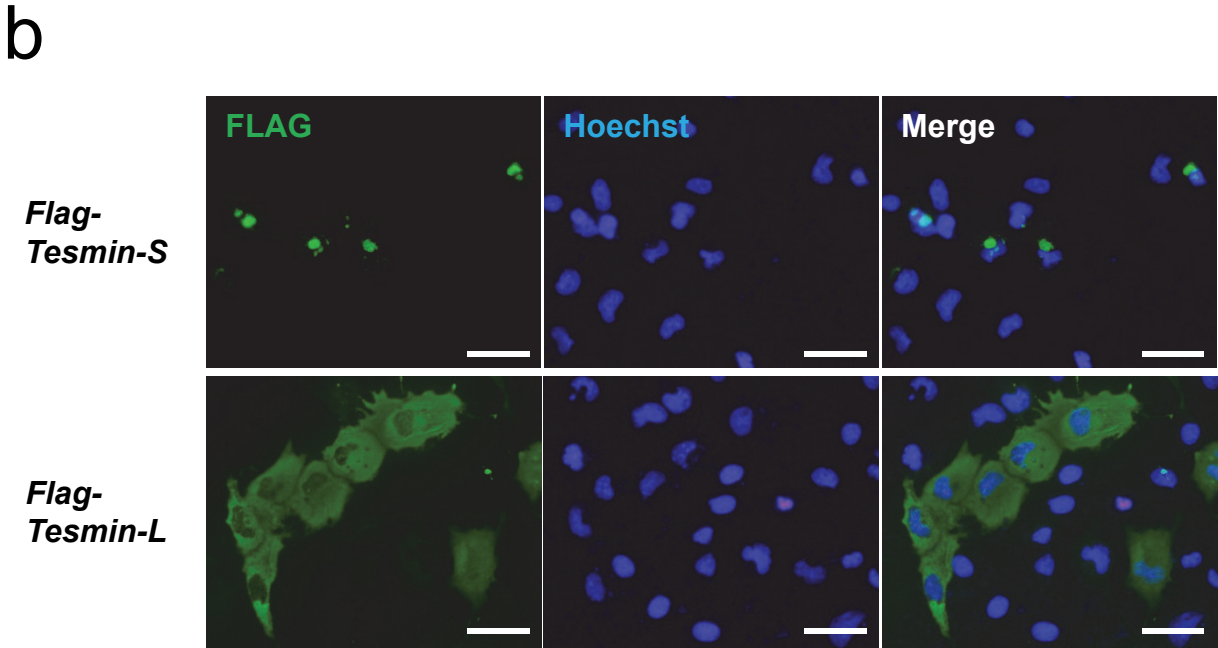

**Fig. S2** (Oji *et al.*)

Het

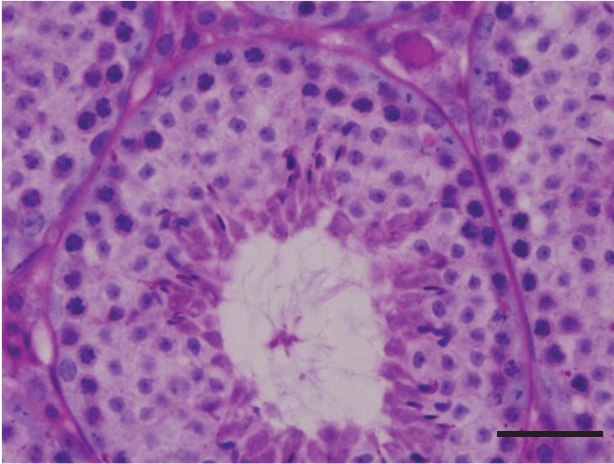

KO

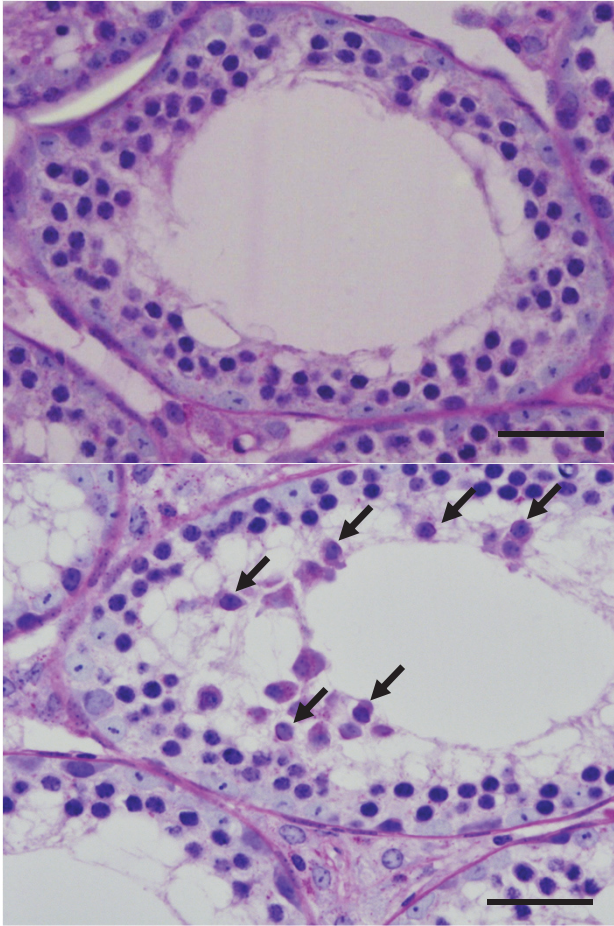

**Fig. S3 (Oji *et al.*)**

**TESMIN-L** 265 PALQGPPKITLSGYCDCFSSG-DFCNS-CSCNNLRHELERFKAIKACLDRNPEAFQPKMGKGRLLGA 328  
**MT1** 1 -----MDP-NCSCSTGGSCCTCTSSCACK----- 22  
**MT2** 1 -----MDP-NCSCASDGSCSCAGACKCK----- 22  
**MT3** 1 -----MDPETCPCPTGGSCCTCSDKCKCK----- 23  
**MT4** 1 -----MDPGECTCMSGGICICGDNCKCT----- 23

**TESMIN-L** 329 AKLRHSGKGCNCKRSGCLKNYCECYEAKIM-CSSICKCIACKNYEESPERKMLMSTPHYMEPGDFES 393  
**MT1** 23 -----NCKC--TSCKKSCCSCPVGCSKCAQGCVCKG-----AADKCTCCA\* 61  
**MT2** 23 -----QCKC--TSCKKSCCSCPVGCAKCSQGCIcke-----ASDKSCCA\* 61  
**MT3** 24 -----GCKC--TNCKKSCCSCPAGCEKCAKDCVCKGEEGAKAEAEKSCCQ\* 68  
**MT4** 24 -----TCSC--KTCRKSCCPCCPPGCAKCARGCICKG-----GSDKSCCP\* 62
